# Supplementary material for: Iliofemoral Tortuosity Increases the Risk of Access-Site-Related Complications After Aortic Valve Implantation and Plug-Based Access-Site Closure
Source: PubMed Central journal article supplement (PMC9294987; doi:10.1016/j.cjco.2022.03.006), 2022-03-19
Supplement: mmc1.pdf [file mmc1.pdf]

**SUPPLEMENTARY MATERIAL**

**Supplemental Table S1.** Univariable binary logistic analysis of various potential predictors of vascular and bleeding complications.

|                                                           | OR    | CI           | P     |
|-----------------------------------------------------------|-------|--------------|-------|
| <i>Female gender</i>                                      | 0.504 | 0.229-1.113  | 0.09  |
| <i>Semi-quantitative calcium score</i>                    |       |              |       |
| - Mild                                                    | 1.297 | 0.296-5.688  | 0.730 |
| - Moderate                                                | 1.158 | 0.240-5.578  | 0.855 |
| - Severe                                                  | 2.5   | 0.370-16.888 | 0.347 |
| <i>Calcium volume (mm3)</i>                               | 1.000 | 1.000-1.000  | 0.816 |
| <i>Echo guided puncture</i>                               | 2.414 | 0.973-5.989  | 0.057 |
| <i>Left-sided puncture</i>                                | 0.000 | 0.000-       | 0.999 |
| <i>Number of punctions</i>                                | 1.800 | 0.420-7.720  | 0.429 |
| <i>Minimal iliofemoral diameter</i>                       | 0.920 | 0.752-1.126  | 0.419 |
| <i>Sheath-to-artery ratio (iliofemoral min. diameter)</i> | 0.592 | 0.119-2.993  | 0.521 |
| <i>Angulation &gt;49.5</i>                                | 3.436 | 1.533-7.699  | 0.003 |
| <i>Tortuosity index &gt;22.8</i>                          | 2.767 | 1.252-6.120  | 0.012 |
| <i>Combination score</i>                                  |       |              |       |
| - >49.5° or >22.8                                         | 2.722 | 1.011-7.332  | 0.048 |
| - >49.5° and >22.8                                        | 5.115 | 1.890-13.847 | 0.001 |

**Supplemental Table S2.** Age and gender corrected multivariable analysis of the predictors of vascular and bleeding complications

|                                 | <i>OR</i>    | <i>CI</i>           | <i>P</i>     |
|---------------------------------|--------------|---------------------|--------------|
| <i>Age (years)</i>              | <i>0.970</i> | <i>0.894-1.052</i>  | <i>0.463</i> |
| <i>Female gender</i>            | <i>0.504</i> | <i>0.229-1.113</i>  | <i>0.09</i>  |
| <i>Echo guided puncture</i>     | <i>1.952</i> | <i>0.745-5.114</i>  | <i>0.173</i> |
| <i>Combination score</i>        |              |                     |              |
| - <i>&gt;49.5° or &gt;22.8</i>  | <i>2.722</i> | <i>1.011-7.332</i>  | <i>0.048</i> |
| - <i>&gt;49.5° and &gt;22.8</i> | <i>5.115</i> | <i>1.890-13.847</i> | <i>0.001</i> |
